# Supplementary material
Source: Springer Nature journal article supplement (https://www.springermedizin.de/resource/supplementary/13000_2012_659_MOESM3_ESM.pdf/9624864)

Study  
ID

OR (95% CI)

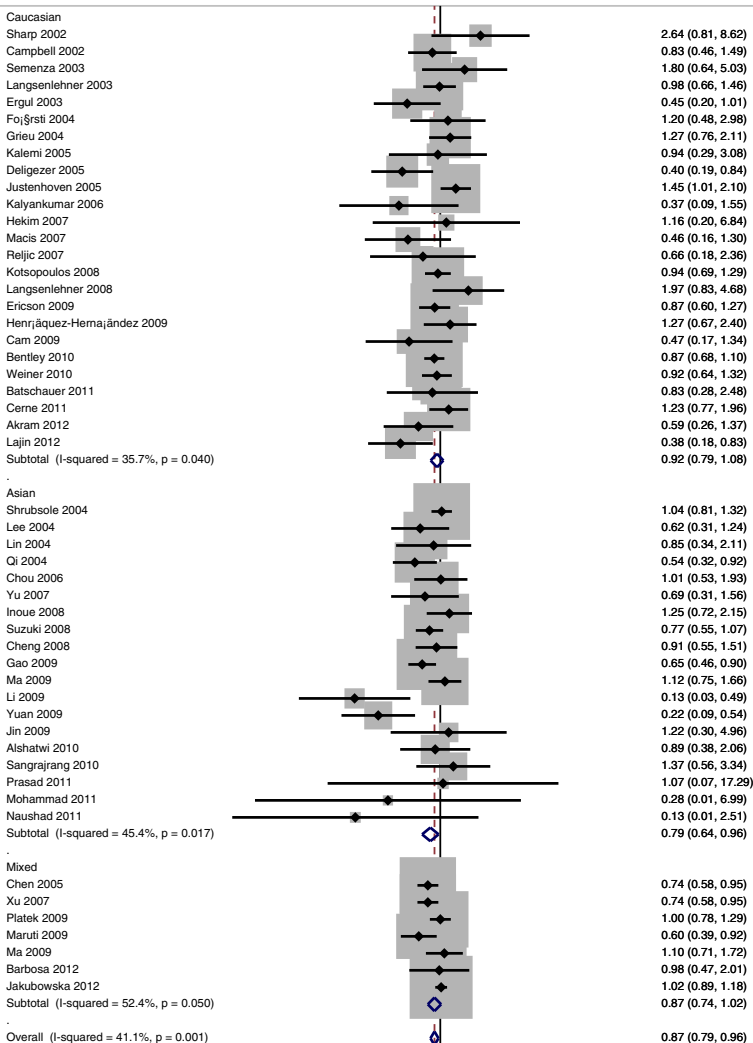

NOTE: Weights are from random effects analysis

5 1 5

Supplement: MOESM3 [file 9624864]
